# Supplementary material for: The Contractile Function of the Left Ventricle Assessed by Speckle Tracking in Healthy Subjects is Not Affected by the Initiation of Mechanical Ventilation. Comparison with Conventional Echocardiographic Methods
Source: Research Square preprint supplement (doi:10.21203/rs.3.rs-7067499/v1), 2025-07-30
Supplement: Supplementary file 1 [file 39fa69be0379ecc267d05f3c.xlsx]

## Sheet: Hoja1
Id	Gender	Age	Weight	Height	BMI	Type of surgery	Respiratory rate rpm postMV	SatO2% preMV	Systolic pressure preMV mmHg	Diastolic pressure pre MV mmHg	Mean blood pressure preMV mmHg	Heart rate bpm preMV	Heart rate bpm postMV	Respiratory rate rpm postMV	SatO2% postMV	Systolic pressure postMV mmHg	Diastolic pressure postMV mmHg	Mean blood pressure postMV mmHg	Tidal volume mL	Plateau pressure cmH2O	PEEP cmH2O	Ejection fraction% Simpson preMV	LVOT VTI preMV cm	MAPSE lat preMV mm	MAPSE septal preMV mm	S´ septal preMV cm/s	S´ lateral preMV cm/s	Ejection fraction % Simpson postMV	LVOT VTI postMV cm	MAPSE lat postMV cm	MAPSE septal postMV	S´ septal postMV cm/s	S´ lateral postMV cm/s	E preMV cm/s	E/a preMV cm/s	E´ medial preMV cm/s	E´ lateral preMV cm/s	E´ mean preMV cm/s	E/E´ mean preMV cm/s	E postMV cm/s	E/a postMV cm/s	E´ medial postMV cm/s	E´ lateral postMV cm/s	E´ mean postMV cm/s	E/E´mean postMV cm/s	GLS4C pre MV	GLS4C post MV	STE basal lateral% preMV	STE basal septal% preMV
1	Female	30	51	162	19.433	Gynaecological	12	100	107	52	70.3333	68	56	10	100	101	59	73	426	12	0	67	21.4	16.3	13.5	7.75	11.5	54.5	22.6	15.5	10.7	8.79	9.42	113	1.98	13.6	18.4	16	7.0625	106	3.6	13.5	18	15.75	6.73016	-16.6	-20.1	-26	-20.6
2	Female	46	55	159	21.7555	Digestive	8	100	148	86	106.667	70	82	14	100	144	93	110	410	12	5	61.6	16.9	14	13.2	7.54	12.4	75.5	12.8	9.58	7	7.54	10.9	104	1.37	11.7	11.1	11.4	9.12281	70.8	1.74	9	9.53	9.265	7.64166	-19.2	-16	-11.1	-11.3
4	Female	51	85	167	30.478	Gynaecological	10	98	158	95	116	86	74	12	100	135	76	95.6667	647	21	3	69.1	20.2	16.3	12.7	10	12.7	67.5	23.6	15	9.97	6.8	8.06	93.6	1.56	12.1	17.8	14.95	6.26087	95.4	1.68	10.2	12.5	11.35	8.40529	-16.6	-21.7	-11.8	-24.4
5	Female	42	47	160	18.3594	Gynaecological	14	100	116	70	85.3333	70	85	13	100		0	0	537	12	5	56.6	22.6	17	20.4	7.75	8.9	52.2		18.4	13.6	6.59	9.84	107	1.24	16.6	14	15.3	6.99346	87.6	1.3	9.84	11.5	10.67	8.20993	-17.5	-19.7	-16.5	-18.7
7	Female	40	58	155	24.1415	Gynaecological	16	100	129	86	100.333	77	90	12	100	127	83	97.6667	480	12	4	55	14.9	13.1		7.33	8.48	53.9	19	12.5		10.5	12.2	87	1.19	13.5	17.6	15.55	5.59486	79.2	1.19	11.3	12.4	11.85	6.68354	-19.5	-13.52	-20.1	-9.6
9	Female	39	63	164	23.4236	Gynaecological	16	100	137	80	99	61	63	12	100	106	66	79.3333	420	12	5	73.2	24.9	15.7	12.3	7.33	8.17	67	22.2	11.5		7.64	10.6	96	1.72	13	12.5	12.75	7.52941	75.6	1.16	11.5	9.11	10.305	7.33624	-19.1	-17.2	-17.6	-11.6
12	Female	33	79	170	27.3356	Digestive	10	100	111	74	86.3333	79	108	12	99	107	62	77	480	15	4	68.5	24.7	14.7	13.1	12	9.94	56.6	17.6	10.3	12.7	8.69	11.5	108	1.43	14.3	14.1	14.2	7.60563	77.4	1.42	9.94	11.3	10.62	7.28814	-20.4	-15	-34.4	-22.2
13	Female	39	58	155	24.1415	Digestive	23	98	151	91	111	92	79	14	100	124	79	94	475	15	2	53.8	14.8	14.5	12.7	8.79	15.1	56	15.9	12.7	14.4	9.32	13.6	84.6	1.25	17	18.4	17.7	4.77966	73.2	1.44	11.7	14.3	13	5.63077	-17.4	-22.3	-16.1	-11.7
14	Male	24	72	184	21.2665	Otorhinolaryngological	16	100	142	109	120	72	90	14	100	113	67	82.3333	685	16	2	34.9	20.1	15.3	14.2	10	10.5	37.2	16.2	12.7	13.2	7.75	14.8	89.4	1.69	14.4	18	16.2	5.51852	79.2	1.91	12.2	13.4	12.8	6.1875	-23.6	-22.8	-44.3	-21.9
15	Female	38	53	160	20.7031	Digestive	14	100	125	69	87.6667	63	69	12	98	97	56	69.6667	563	0	2	55.7	16.8	17.7	18.4	7.01	6.8	45	18.8	10.7	11	6.7	9	96	1.74	9.53	15.1	12.315	7.79537			8.79	12.7	10.745		-22.6	-22.5	-44.1	-22.9
16	Female	63	75	154	31.6242	Digestive	24	96	134	84	100.667	78	72	13	99	119	67	84.3333	300	0	7	37.9	24.8	13.6	11.3	9.63	7.96	62.7	28.7	19.5	14.5	11.2	12.2	54	0.59	15.7	10.7	13.2	4.09091			17.9	18.4	18.15		-16.6	-17.7	-23.4	-46.1
17	Female	43	50	157	20.2848	Urological	10	100	102	62	75.3333	66	96	12	100	141	91	107.667	399	14	4	55.2	25.7	14.7		8.49	7.12	51.8	25	13.3		10.8	7.54	77.4	2.08	9.1	11.7	10.4	7.44231	90	1.52	11.4	10.8	11.1	8.10811	-21.5	-16.3	-23.3	-11.8
19	Male	50	92	174	30.3871	Otorhinolaryngological	12	99	135	82	99.6667	64	108	14	99	134	93	106.667	574	17	3	50.7	24.3	16.1	12.9	11	12.3	46.1	16.3	18.3	12.4	12	18.4	71.4	1.14	9.21	10.9	10.055	7.10094	50.6	0.7	8.58	15.3	11.94	4.23786	-22.2	-20.5	-21.6	-7.8
20	Male	60	52	171	17.7832	Otorhinolaryngological	20	100	143	98	113	75	96	12	100	153	103	119.667	428	11	3	51.8	17.7	16.3	9.12	7	8.17	47.5	14.9	10.4	8.61	10.8	10.55	52.2	1.09	10.7	11.3	11	4.74545			7.43	11.5	9.465		-19.2	-15.7	-30	-14
21	Male	46	87	183	25.9787	Otorhinolaryngological	15	99	163	96	118.333	52	74	12	100	139	42	74.3333	527	12	3	44.6	27.6	15.9	15.3	7.85	10.7	55.4	28.6	13.8	15.8	9.74	12.8			13.4	14.2	13.8								-16.7	-15.9	-13.3	-21.9
22	Male	42	99	191	27.1374	Urological	12	100	128	78	94.6667	67	61	12	100	101	58	72.3333	439	14	4	52.4	14.6	13.6		11.4	10	67.5	14.2			14.5	7.07	61.02	1.09	9	9.84	9.42	6.47771	50.4	1.08	11.1	8.48	9.79	5.14811	-10.7	-17.8	-9.1	-23.4
24	Female	38	76	167	27.2509	Digestive	12	100	145	97	113	91	82	12	100	91	53	65.6667	500	11	0	58.5	25.9	19.3	19.7	11.7	11.3	62.9	24.8	16.1	15.3	11.5	15.5	84	1.22	13	20.5	16.75	5.01493	72	1.3	10.6	12.1	11.35	6.34361	-20.1	-16.6	-27.9	-45
25	Female	33	62	159	24.5243	Digestive	12	100	121	68	85.6667	78	90	17	100	105	63	77	520	15	5	59.9	26	12.2	13.6	6.91	7.33	61.5	20.9	14.4	10.6	7.64	13	49.2	0.599	12.5	18.4	15.45		69.6	1.3	10.7	14	12.35		-13.8	-16.4	-30	-16.9
26	Female	42	62	171	21.2031	Digestive	16	100	110	67	81.3333	58	85	14	100	126	78	94	553	14	5	60.7	22.8	16.7		7.33	9.98	62.8	22.9	13.1		9.74	9.21	88.8	1.17	11.1	9.42	10.26	8.65497			10.5	10.5	10.5		-22	-17.3	-26.5	-29.8
27	Female	60	79	167	28.3266	Urological	20	96	125	70	88.3333	64	69	15	100	104	69	80.6667	438	17	11	50.4	28.3	16.4	16.9	9.84	12.7	42.9	18.4	14.9	11.9	11.3	13.6	62.4	0.92	7.33	13.2	10.265	6.07891	46.8	1	6.18	7.1	6.64	7.04819	-14.3	-14.5	-18.5	-13.5
	BMI: body mass index; PEEP: Positive end-expiratory pressure; MV: mechanical ventilation.
	GLS4C: Global longitudinal strain of the left ventricle in the 4-chamber view
	LVOT VTI: Left ventricular outflow tract velocity-time integral					l
	MAPSE: Mitral annular plane systolic excursion
	STE: speckle tracking echocardiography
[truncated: 10 more columns]

## Sheet: Hoja2
Strain L globalpre	Strain L globalpost
-16.6	-20.1
-19.2	-16
-11.4	0
-16.6	-21.7
-17.5	-19.7
-19.5	-13.52
-19.1	-17.2
-20.4	-15
-17.4	-22.3
-23.6	-22.8
-22.6	-22.5
-16.6	-17.7
-21.5	-16.3
-22.2	-20.5
-19.2	-15.7
-16.7	-15.9
-10.7	-17.8
-20.1	-16.6
-13.8	-16.4
-22	-17.3
-14.3	-14.5
-18.1429	-17.12
